# Supplementary material for: OsbZIP58, a basic leucine zipper transcription factor, regulates starch biosynthesis in rice endosperm
Source: PubMed Central journal article supplement — J Exp Bot. 2013 Jul 11;64(11):3453–66. doi: 10.1093/jxb/ert187 (PMC3733163; doi:10.1093/jxb/ert187), 2013-07-11
Supplement: supp_ert187_jexbot095265_file001.pdf [file supp_ert187_jexbot095265_file001.pdf]

## Supplementary Data

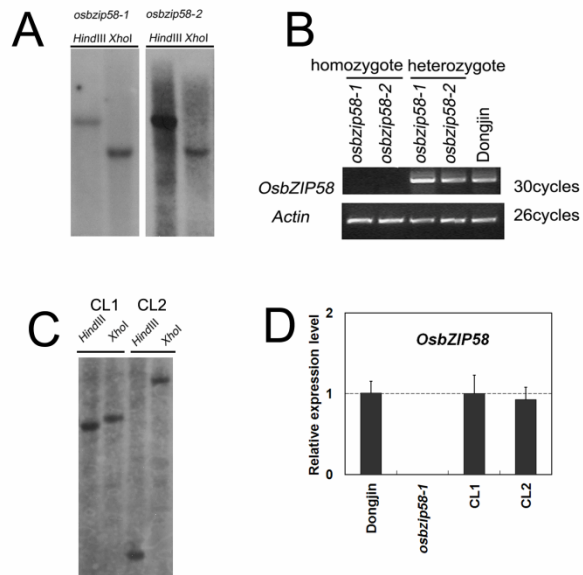

**Figure S1** Identification and characterization of the *osbzip58* mutants and CLs.

(A) Southern blot analysis of *osbzip58-1* and *osbzip58-2*. Genomic DNA isolated from homozygous mutants of the T<sub>4</sub> generation were digested with *Hind*III or *Xho*I and hybridized with labeled *HPTII* coding sequences.

(B) Expression levels of *OsbZIP58* in developing seed of homozygous, heterozygous mutants and wild-type plants analyzed by semi-quantitative RT-PCR. The rice *OsAct1* was used as control.

(C) Southern blot analysis of CL1 and CL2. Genomic DNA isolated from homozygous transgenic plants of the T<sub>2</sub> generation were digested with

*Hind*III or *Xho*I and hybridized with labeled NPTII coding sequences.

(D) Expression level of *Os*bZIP58 in its CL transgenic plants. Total RNA was extracted from seeds at 10 DAF. The expression of wild-type seeds was used as control. All the data are shown as mean  $\pm$  s.d. from four replicates.

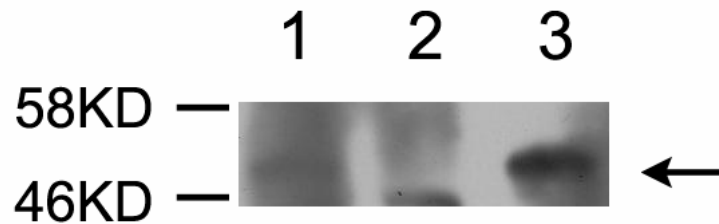

**Figure S2** Western blot detecting the specificity of the anti-*Os*bZIP58 antibody

Lane 1: 40ug total protein of immature seed of *Dongjin*. Lane 2: 40ug total protein of immature seed of *osbzip58-1*. Lane 3: 40ug total protein of immature seed of CL3 (Complemented line 3, a transformant with a wild type *Os*bZIP58 gene in the *osbzip58-1* mutant and the expression of *Os*bZIP58 in it was 8 times higher than the wild type in this line). The black arrow indicates the *Os*bZIP58 protein, about 46 kD.

**Table S1** Information of primers used in this study

| Assay                      | Primer ID | Primer Specific Name | Primer Sequence ( from 5' to 3' )    | Restricted Enzyme Site | Reference              |
|----------------------------|-----------|----------------------|--------------------------------------|------------------------|------------------------|
| Yeast one-hybrid screening | GE0121    | OsbZIP58 F           | G GAATTCTGGAGCACGTGTTCCGCCG          | EcoRI                  | LOC_Os07g08420         |
|                            | GE0122    | OsbZIP58 R           | GCAGATCTCTACTGAAGCTCCATGTTGAC<br>AAG | BglIII                 |                        |
|                            | GE0140    | OsbZIP15 F           | GGAATTCTGGACATCGAGGCGTTCATC          | EcoRI                  | LOC_Os02g07840, RISBZ4 |
|                            | GE0141    | OsbZIP15 R           | GCGAGCTCAGCCCCAGGCGTCAACCAC          | SacI                   |                        |
|                            | GE0241    | OsbZIP20 F           | GGAATTCTGAAGAAGTGCCCGTCGGAG          | EcoRI                  | LOC_Os02g16680         |
|                            | GE0242    | OsbZIP20 R           | GCGAGCTCCGTAGCTGAGCTGACAAAGCA<br>G   | SacI                   |                        |
|                            | GE0142    | OsbZIP33 F           | GGAATCCGATGGAGCGGGTGTCT              | EcoRI                  | LOC_Os03g58250, REB    |
|                            | GE0143    | OsbZIP33 R           | GCGAGCTCTCTGGGTTTCGGTCTCAGG          | SacI                   |                        |
|                            | GE0123    | OsbZIP34 F           | GGAATTCTGGCATCCTCGGCCGCCT            | EcoRI                  | LOC_Os03g59460,        |
|                            | GE0124    | OsbZIP34 R           | GCGAGCTCCTACCCTTTGCTGTATCATT<br>GTG  | SacI                   |                        |
|                            | GE0144    | OsbZIP35 F           | GGAATTCTGGAGGGTGAACCCTCACG           | EcoRI                  | LOC_Os04g10260         |
|                            | GE0145    | OsbZIP35 R           | TCCCCGCGTTATTGTGGCTGATTATGCTG<br>GA  | SacII                  |                        |
|                            | GE0243    | OsbZIP40 F           | GGAATTCTGGCGTCGTCGAGGGTGA            | EcoRI                  | LOC_Os05g36160 TIGR    |
|                            | GE0244    | OsbZIP40 R           | GCGAGCTCCCATTCCATTGAGTTGGTTCTT<br>C  | SacI                   |                        |

|                             |        |              |                                   |         |                         |
|-----------------------------|--------|--------------|-----------------------------------|---------|-------------------------|
|                             | GE0146 | OsZIP50 F    | GGAATTCTGGATGTAGAGTTCTTCGCC       | EcoRI   | LOC_Os06g41770          |
|                             | GE0147 | OsZIP50 R    | GCACTAGTAGCTGCTGCTAAACGGAACG      | SpeI    |                         |
|                             | GE0148 | OsZIP52 F    | GGAATTCTGATGAAGAAGTGCCCGTCG       | EcoRI   | LOC_Os06g45140 , RISBZ5 |
|                             | GE0149 | OsZIP52 R    | GCGAGCTCCCACACATCAGCCGAGCAG       | SacI    |                         |
|                             | GE0152 | OsZIP76 F    | GGAATTCCTAGT CCT TGCACC CTAACA    | EcoRI   |                         |
|                             | GE0153 | OsZIP76 R    | GCGAGCTCTCATCAGAAATCACCTAAAG<br>C | SacI    | LOC_Os09g34880 ,        |
| Antibody and <i>in situ</i> | GE0336 | OsZIP58-ET F | GCGGATCCATGGAGCACGTGTTCCGCCG      | BamHI   |                         |
|                             | GE0311 | OsZIP58-ET R | GCAAGCTTAAGGATCATATTTCCCATTC<br>C | HinDIII | Os07g08420 ORF          |
| Mutant Identification       | GE0295 | pGA2715 R    | CCACAGTTTTTCGCGATCCAGACTG         |         | pGA2715                 |
|                             | GE0301 | Os07g08420 R | CCCCATCTACAATCGACTGG              |         | Os07g08420 DNA 1219     |
|                             | GE0279 | Os07g08420 F | GCGGATCC GGGTTGCTGGAGCGGTGC       |         |                         |
| RT-PCR                      | GE0013 | OsRAC F      | CCTGCTATGTACGTCGCCATC             |         | Actin                   |
|                             | GE0014 | OsRAC R      | CCGCAGCTTCCATTCCCTATGA            |         |                         |
|                             | GE0332 | OsZIP58-RT F | AGACATTGAAGCCCTAAGAGC             |         | Os07g08420              |
|                             | GE0333 | OsZIP58-RT R | ACGATCCCCATGCTGTATATTC            |         |                         |
| qRT-PCR                     | GE0348 | OsAGPS2b F   | AACAATCGAAGCGCGAGAAA              |         | AGPS2b , AK103906       |
|                             | GE0349 | OsAGPS2b R   | GCCTGTAGTTGGCACCCAGA              |         |                         |
|                             | GE0352 | OsAGPL2 F    | AGTTGATTCAAGACGGATAGC             |         | OsAGPL2 , U66041        |
|                             | GE0353 | OsAGPL2 R    | CGACTTCCACAGGCAGCTTATT            |         |                         |
|                             | GE0548 | OsAGPL3 F    | AAGCCAGCCATGACCATTTG              |         | AK069296                |
|                             | GE0549 | OsAGPL3 R    | CACACGGTAGATTCACGAGACAA           |         |                         |
|                             | GE0354 | OsSSI F      | GGGCCTTCATGGATCAACC               |         |                         |

|        |            |                           |                                                 |
|--------|------------|---------------------------|-------------------------------------------------|
| GE0355 | OsSSI R    | CCGCTTCAAGCATCCTCATC      |                                                 |
| GE0356 | OsSSIIa F  | GCTTCCGGTTTGTGTGTTCA      |                                                 |
| GE0357 | OsSSIIa R  | CTTAATACTCCCTCAACTCCACCAT | OsSSIIa , OsSSII-3 , AF419099                   |
| GE0556 | OsSSIIIa F | GCCTGCCCTGGACTACATTG      |                                                 |
| GE0557 | OsSSIIIa R | GCAAACATATGTACACGGTTCTGG  | AY100469                                        |
| GE0360 | OsSSIVb F  | ATGCAGGAAGCCGAGATGTT      |                                                 |
| GE0361 | OsSSIVb R  | ACGACAATGGGTGCCAAGAT      | OsSSIVb , OsSSIVb , AY373258                    |
| GE0362 | OsGBSSI F  | AACGTGGCTGCTCCTTGAA       |                                                 |
| GE0363 | OsGBSSI R  | TTGGCAATAAGCCACACACA      | OsGBSSI , X62134                                |
| GE0364 | OsBEIIb F  | ATGCTAGAGTTTGACCGC        |                                                 |
| GE0365 | OsBEIIb R  | AGTGTGATGGATCCTGCC        | OsBEIIb , SBE3 , D16201                         |
| GE0366 | OsISA1 F   | TGCTCAGCTACTCCTCCATCATC   |                                                 |
| GE0367 | OsISA1 R   | AGGACCGCACAACTTCAACATA    | OsISA1 , AB093426                               |
| GE0368 | OsPUL F    | ACCTTTCTTCCATGCTGG        |                                                 |
| GE0369 | OsPUL R    | CAAAGGTCTGAAAGATGGG       | OsPUL , AB012915                                |
| GE0386 | OsBEI F    | TGGCCATGGAAGAGTTGGC       |                                                 |
| GE0387 | OsBEI R    | CAGAAGCAACTGCTCCACC       | OsBEI,D11082                                    |
| GE0422 | UBQ10 F    | TGGTCAGTAATCAGCCAGTTTGG   |                                                 |
| GE0423 | UBQ10 R    | GCACCACAAATACTTGACGAACAG  | AK101547 ; 06-BBRC-housekeeping<br>gene in rice |
| GE0841 | OsPHOL F   | TTGGCAGGAAGGTTTCGCT       |                                                 |
| GE0842 | OsPHOL R   | CGAAGCCTGAAGTGAAGTTGCT    | AK063766                                        |
| GE0566 | OsISA2 F   | TAGAGGTCCTCTTGAGG         |                                                 |
| GE0567 | OsISA2 R   | AATCAGCTTCTGAGTCACCG      | AC132483                                        |
| GE0390 | OsZIP58 F  | CTCCAACGCTAACAATGC        |                                                 |
| GE0391 | OsZIP58 R  | GCTCTATTCTGAAGATGCTG      | LOC_Os07g08420M,RISBZ1                          |



**Table S2** Locations of promoter regions and sequences of primers used in the ChIP-PCR assays

| <b>Fragment Name</b> | NCBI ID                            | Primer Name | Primer Sequence (from 5' to 3') | “ACGT” Site | “ACGT” number |
|----------------------|------------------------------------|-------------|---------------------------------|-------------|---------------|
| <b>OsAGPL2</b>       | Os01g0633100                       | GE0600      | TGCGTTACGGCATCTCCACCT           | +2194~+2489 | 3             |
|                      |                                    | GE0601      | TGCAGAGGAAGGAAGCAGGGT           |             |               |
| <b>OsAGPL3</b>       | Os03g0735000                       | GE0614      | CTTGGCTGCCTGCCACTCCC            | -241~-76    | 4             |
|                      |                                    | GE0615      | CTAGGGACACAACCGCGGCG            |             |               |
| <b>Wx/GBSSI -a</b>   |                                    | GE0677      | CCGCTGGCACCGGAGGACTA            | -1670~-1506 | 7             |
|                      |                                    | GE0678      | TCCGTCCTTCAACCGCAAAACCA         |             |               |
| <b>Wx/GBSSI -b</b>   | Os06g0133000                       | GE0679      | CGCAGGTAATTGACACCCACG           | -1051~-770  | 6             |
|                      |                                    | GE0680      | CATGCAGGGCGAGGCTAGCG            |             |               |
| <b>Wx/GBSSI -c</b>   |                                    | GE0681      | GGCAGGCACTCAGCTCGCTG            | -684~-551   | 3             |
|                      |                                    | GE0682      | GTACGTCGCTCGCGTGTGCT            |             |               |
| <b>OsSSIIa-a</b>     | Os06g0229800                       | GE0624      | ACCCTGGTGGCCGAAATGAA            | -1551~-1394 | 3             |
|                      |                                    | GE0625      | ATCCAAGCGAACTCCCACAGTG          |             |               |
| <b>OsSSIIa-b</b>     |                                    | GE0628      | ACCTGCATCCGCAACTGGCA            | -420~-217   | 4             |
|                      |                                    | GE0629      | ACGTTAACGGCTCGGGGTGC            |             |               |
| <b>OsSSIIIa</b>      | OSJNBa0056O06.4,<br>LOC_Os08g09230 | GE0651      | CCAGTTTGGTATGGTTTCCATTGA        | -1559~-1281 | 3             |
|                      |                                    | GE0652      | ACCGGGAATGTAATTATCCGGGT         |             |               |
| <b>OsSSIVb</b>       | Os05g0533600                       | GE0675      | TGGGTTTGGACTTGTAGATGGGCA        | -655~-351   | 3             |
|                      |                                    | GE0676      | ACTCCCTCCGTCCCAAATAAGT          |             |               |
| <b>SBE1-a</b>        | Os06g0726400                       | GE0697      | ACATATGCCTTTGTGCCGGGA           | -831~-663   | 3             |
|                      |                                    | GE0698      | AGGCTCATTAGATTCGTCTCGCA         |             |               |
| <b>SBE1-b</b>        |                                    | GE0463      | GGTTTGTATTTATTTGCGTCTGG         | -178~+146   | 3             |
|                      |                                    | GE0467      | GGAGGAGGAAGAGGAGGTGAG           |             |               |

|                   |                                    |        |                           |             |   |
|-------------------|------------------------------------|--------|---------------------------|-------------|---|
| <b>OsSBEIIb-a</b> | Os02g0528200                       | GE0707 | CGCTCGATGGCATGAGGGTC      | -1660~-1378 | 3 |
|                   |                                    | GE0708 | AGTGGGTTGTAGGTTGCATTTAGAC |             |   |
| <b>OsSBEIIb-b</b> |                                    | GE0709 | CGGTTAGACCGAATGCCACCC     | -968~-757   | 3 |
|                   |                                    | GE0710 | ACACCGGTGCTCTGTTGTTTCA    |             |   |
| <b>OsISA1</b>     | Os08g0520900                       | GE0711 | CGGCCCAAGCCGTCTGTTGA      | -1898~-1585 | 5 |
|                   |                                    | GE0712 | TGTGGTGTGGCCGTCTTTTCT     |             |   |
| <b>OsISA2</b>     | OSJNBa0014C03.3,<br>LOC_Os05g32710 | GE0719 | GACAACGGTCAGCCCAGCCC      | -744~-641   | 3 |
|                   |                                    | GE0720 | GTGGCGTCGTCCTGCTGTCC      |             |   |
| <b>Actin</b>      | OsActin1                           | GE0424 | CAGCCACACTGTCCCCATCTA     |             |   |
|                   |                                    | GE0425 | AGCAAGGTCGAGACGAAGGA      |             |   |
